# Supplementary material for: Quantification of the Impact of Fine Particulate Matter on Solar Energy Resources and Energy Performance of Different Photovoltaic Technologies
Source: PubMed Central journal article supplement — ACS Environ Au. 2022 Feb 21;2(3):275–86. doi: 10.1021/acsenvironau.1c00048 (PMC10114768; doi:10.1021/acsenvironau.1c00048), 2022-02-21
Supplement: vg1c00048_si_001.pdf [file vg1c00048_si_001.pdf]

# Supporting Information

## Quantification of the Impact of Fine Particulate Matter on Solar Energy Resources and Energy Performance of Different Photovoltaic Technologies

Zhe Song<sup>a,\*</sup>, Meng Wang<sup>b</sup>, Hongxing Yang<sup>a,\*</sup>

---

<sup>a</sup> Renewable Energy Research Group (RERG), Research Institute for Sustainable Urban Development, The Hong Kong Polytechnic University, Hung Hom, Kowloon, Hong Kong, China

<sup>b</sup> School of Energy and Power Engineering, Changsha University of Science and Technology, Changsha 410114, Hunan, China

\* Corresponding authors

[zhe9501.song@connect.polyu.hk](mailto:zhe9501.song@connect.polyu.hk) (Z. Song)

[hong-xing.yang@polyu.edu.hk](mailto:hong-xing.yang@polyu.edu.hk) (H.X. Yang)

**Table S1.** Key specifications of the PV modules used in the experiments. The details of the model and manufacturer of all PV modules are faded away to avoid conflicts of interest.

| PV module |    | Specification <sup>a</sup> |                     |                     |                     |                     |                      |                    |                   |                    |
|-----------|----|----------------------------|---------------------|---------------------|---------------------|---------------------|----------------------|--------------------|-------------------|--------------------|
|           |    | $P_{m,ref}$<br>(W)         | $V_{oc,ref}$<br>(V) | $I_{sc,ref}$<br>(A) | $V_{mp,ref}$<br>(V) | $I_{mp,ref}$<br>(A) | Dimension<br>(mm×mm) | $\alpha$<br>(%/°C) | $\beta$<br>(%/°C) | $\gamma$<br>(%/°C) |
| mono-Si   | #1 | 305                        | 40.2                | 9.94                | 33.0                | 9.24                | 1650×991             | 0.059              | −0.30             | −0.39              |
|           | #2 | 300                        | 39.76               | 9.77                | 32.41               | 9.26                | 1670×1000            | 0.04               | −0.28             | −0.39              |
| poly-Si   | #1 | 280                        | 38.65               | 9.37                | 31.61               | 8.86                | 1650×991             | 0.058              | −0.33             | −0.40              |
|           | #2 | 275                        | 38.72               | 9.35                | 31.36               | 8.77                | 1670×1000            | 0.04               | −0.29             | −0.40              |
| a-Si      | #1 | 140                        | 42.3                | 5.28                | 32.2                | 4.34                | 1310×1110            | 0.01               | −0.38             | −0.47              |
|           | #2 | 130                        | 73.42               | 2.76                | 53.94               | 2.41                | 1300×1100            | 0.07               | −0.32             | −0.29              |
| CIGS      | #1 | 140                        | 106.7               | 1.79                | 86.5                | 1.62                | 1190×790             | 0.01               | −0.27             | −0.32              |
|           | #2 | 115                        | 37.6                | 4.52                | 29.7                | 3.87                | 2598×370             | 0.008              | −0.28             | −0.38              |
| CdTe      | #1 | 107.5                      | 86.6                | 1.75                | 68.6                | 1.57                | 1200×600             | 0.04               | −0.29             | −0.34              |
|           | #2 | 80                         | 118.9               | 0.95                | 94.1                | 0.85                | 1200×600             | 0.06               | −0.321            | −0.214             |

<sup>a</sup>  $P_{m,ref}$ ,  $V_{oc,ref}$ ,  $I_{sc,ref}$ ,  $V_{mp,ref}$ ,  $I_{mp,ref}$ ,  $\alpha$ ,  $\beta$ , and  $\gamma$  refer to maximum power at standard test conditions (STC), the open-circuit voltage at STC, short-circuit current at STC, the voltage at maximum power point (MPP) at STC, current at MPP at STC, temperature coefficient of  $I_{sc,ref}$ , temperature coefficient of  $V_{oc,ref}$ , and temperature coefficient of  $P_{m,ref}$ , respectively.

**Table S2.** Estimated absolute and relative changes in  $E_{AC}$  and  $Y_f$  of ten solar PV systems for given conditions of PM2.5 pollution in Hong Kong.

| PV module                                                         | mono-Si |         | poly-Si |         | a-Si   |        | CIGS   |        | CdTe   |        |
|-------------------------------------------------------------------|---------|---------|---------|---------|--------|--------|--------|--------|--------|--------|
|                                                                   | #1      | #2      | #1      | #2      | #1     | #2     | #1     | #2     | #1     | #2     |
| <b><i>baseline</i></b>                                            |         |         |         |         |        |        |        |        |        |        |
| $E_{AC}$ (Wh)                                                     | 1643.00 | 1513.71 | 1426.88 | 1384.42 | 633.21 | 660.00 | 686.63 | 613.21 | 648.00 | 414.79 |
| $Y_f$ (kWh/kWp)                                                   | 5.39    | 5.05    | 5.10    | 5.03    | 4.52   | 5.08   | 4.90   | 5.33   | 6.03   | 5.18   |
| <b><i>0–12.0 <math>\mu\text{g}/\text{m}^3</math> PM2.5</i></b>    |         |         |         |         |        |        |        |        |        |        |
| $E_{AC}$ (Wh)                                                     | 1624.75 | 1510.85 | 1430.42 | 1389.15 | 634.81 | 659.31 | 684.48 | 618.13 | 651.83 | 415.27 |
| $\Delta E_{AC}$ (Wh)                                              | −18.25  | −2.85   | 3.54    | 4.73    | 1.60   | −0.69  | −2.15  | 4.92   | 3.83   | 0.48   |
| $Y_f$ (kWh/kWp)                                                   | 5.33    | 5.04    | 5.11    | 5.05    | 4.53   | 5.07   | 4.89   | 5.38   | 6.06   | 5.19   |
| $\Delta Y_f$ (kWh/kWp)                                            | −0.06   | −0.01   | 0.01    | 0.02    | 0.01   | −0.01  | −0.02  | 0.04   | 0.04   | 0.01   |
| $\Delta E_{AC}$ , $\Delta Y_f$ (%)                                | −1.11   | −0.19   | +0.25   | +0.34   | +0.25  | −0.10  | −0.31  | +0.80  | +0.59  | +0.12  |
| <b><i>12.1–35.4 <math>\mu\text{g}/\text{m}^3</math> PM2.5</i></b> |         |         |         |         |        |        |        |        |        |        |
| $E_{AC}$ (Wh)                                                     | 1580.99 | 1472.02 | 1396.03 | 1376.40 | 611.28 | 638.11 | 667.41 | 620.49 | 627.31 | 393.31 |
| $\Delta E_{AC}$ (Wh)                                              | −62.01  | −41.69  | −30.84  | −8.02   | −21.93 | −21.89 | −19.22 | 7.28   | −20.69 | −21.48 |
| $Y_f$ (kWh/kWp)                                                   | 5.18    | 4.91    | 4.99    | 5.01    | 4.37   | 4.91   | 4.77   | 5.40   | 5.84   | 4.92   |
| $\Delta Y_f$ (kWh/kWp)                                            | −0.20   | −0.14   | −0.11   | −0.03   | −0.16  | −0.17  | −0.14  | 0.06   | −0.19  | −0.27  |
| $\Delta E_{AC}$ , $\Delta Y_f$ (%)                                | −3.77   | −2.75   | −2.16   | −0.58   | −3.46  | −3.32  | −2.80  | +1.19  | −3.19  | −5.18  |
| <b><i>35.5–55.4 <math>\mu\text{g}/\text{m}^3</math> PM2.5</i></b> |         |         |         |         |        |        |        |        |        |        |
| $E_{AC}$ (Wh)                                                     | 1517.99 | 1392.80 | 1335.41 | 1301.30 | 571.71 | 589.04 | 629.62 | 575.12 | 581.81 | 369.13 |
| $\Delta E_{AC}$ (Wh)                                              | −125.01 | −120.90 | −91.46  | −83.12  | −61.50 | −70.96 | −57.01 | −38.09 | −66.19 | −45.66 |
| $Y_f$ (kWh/kWp)                                                   | 4.98    | 4.64    | 4.77    | 4.73    | 4.08   | 4.53   | 4.50   | 5.00   | 5.41   | 4.61   |
| $\Delta Y_f$ (kWh/kWp)                                            | −0.41   | −0.40   | −0.33   | −0.30   | −0.44  | −0.55  | −0.41  | −0.33  | −0.62  | −0.57  |
| $\Delta E_{AC}$ , $\Delta Y_f$ (%)                                | −7.61   | −7.99   | −6.41   | −6.00   | −9.71  | −10.75 | −8.30  | −6.21  | −10.21 | −11.01 |

**Table S3.** Nomenclature.

| <i>Abbreviations</i> |                                                            |
|----------------------|------------------------------------------------------------|
| AC                   | alternating current                                        |
| AQI                  | air quality index                                          |
| a-Si                 | amorphous silicon                                          |
| CdTe                 | cadmium telluride                                          |
| CIGS                 | copper indium gallium selenide                             |
| c-Si                 | crystalline silicon                                        |
| DC                   | direct current                                             |
| mono-Si              | monocrystalline silicon                                    |
| MPP                  | maximum power point                                        |
| PM2.5                | fine particulate matter                                    |
| POA                  | point-of-array                                             |
| poly-Si              | polycrystalline silicon                                    |
| PV                   | photovoltaic                                               |
| STC                  | standard test conditions                                   |
| <i>Symbols</i>       |                                                            |
| $AM$                 | air mass                                                   |
| $E_{AC}$             | net AC energy output (Wh)                                  |
| $h$                  | altitude (m)                                               |
| $I_0$                | extraterrestrial horizontal irradiance ( $W/m^2$ )         |
| $I_c$                | clear sky irradiance ( $W/m^2$ )                           |
| $I_d$                | diffuse horizontal irradiance ( $W/m^2$ )                  |
| $I_g$                | global horizontal irradiance ( $W/m^2$ )                   |
| $I_{mp,ref}$         | current at MPP at STC (A)                                  |
| $I_{POA}$            | point-of-array irradiance ( $W/m^2$ )                      |
| $I_{ref}$            | PV reference irradiance ( $I_{ref} = 1000 W/m^2$ )         |
| $I_{sc,ref}$         | short-circuit current at STC (A)                           |
| $K_d$                | diffuse fraction                                           |
| $K_t$                | clearness index                                            |
| $P_0$                | installed nominal power (kWp)                              |
| $P_{m,ref}$          | maximum power at STC (W)                                   |
| $PR$                 | performance ratio (%)                                      |
| $R$                  | correlation coefficient                                    |
| $T_L$                | Linke turbidity coefficient                                |
| $V_{oc,ref}$         | open-circuit voltage at STC (V)                            |
| $V_{mp,ref}$         | voltage at MPP at STC (V)                                  |
| $Y_f$                | final yield (kWh/kWp)                                      |
| $Y_{ref}$            | reference yield (kWh)                                      |
| $\alpha$             | temperature coefficient of $I_{sc,ref}$ ( $\%/^{\circ}C$ ) |

|            |                                                |
|------------|------------------------------------------------|
| $\alpha_s$ | solar altitude angle (°)                       |
| $\beta$    | temperature coefficient of $V_{oc,ref}$ (%/°C) |
| $\gamma$   | temperature coefficient of $P_{m,ref}$ (%/°C)  |

---

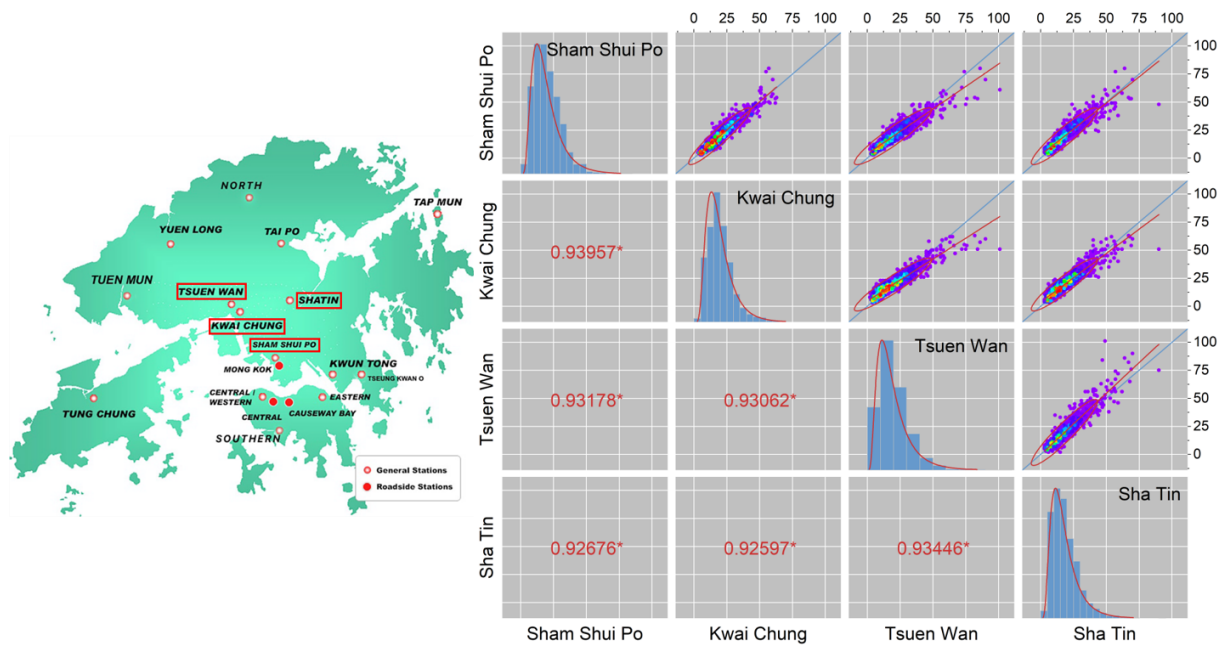

**Figure S1.** Correlation matrix for Tsuen Wan, Kwai Chung, Sha Tin, and Sham Shui Po air quality monitoring stations. The air-line distances between the four general stations are within 7 kilometers. \* denotes significant correlations at the 0.01 level ( $p < 0.01$ ). PM2.5 concentration data were taken from the Environmental Protection Department of Hong Kong (<https://cd.epic.epd.gov.hk/>). From 2016 to 2020, the point-to-point correlation between the measured time series in those stations was more than 0.92, indicating a statistically significant ( $p < 0.01$ ) relationship. Also, there is an obvious correlation between the statistical distributions of PM2.5 concentration values.

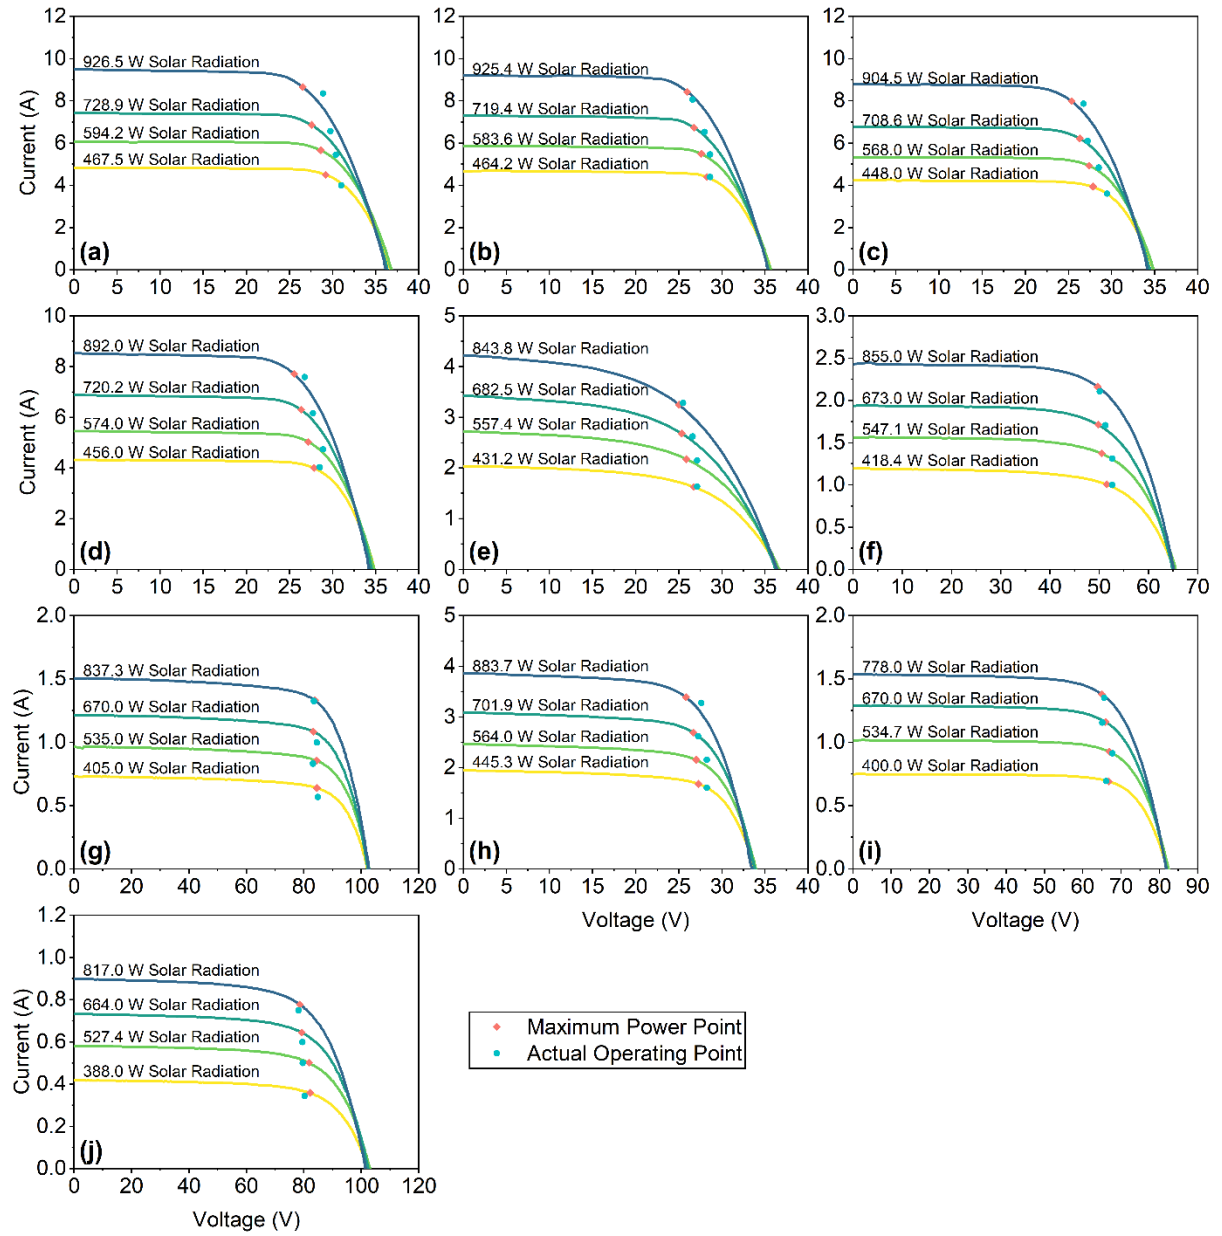

**Figure S2.** Calibration of the power output from optimizers by I-V curve tests for (a) mono-Si #1, (b) mono-Si #2, (c) poly-Si #1, (d) poly-Si #2, (e) a-Si #1, (f) a-Si #2, (g) CIGS #1, (h) CIGS #2, (i) CdTe #1, and (j) CdTe #2 under different levels of solar radiation from 300 W to 1000 W. The rhombic points are the currents and voltages recorded by the optimizer/inverter of the system, while the circular points and lines indicate the I-V curves measured by the I-V checker. The results show that the maximum power points tracked by the optimizers/inverter are all close to the maximum power points detected by the I-V curve checker, demonstrating that the PV modules did produce their maximum power at any time.

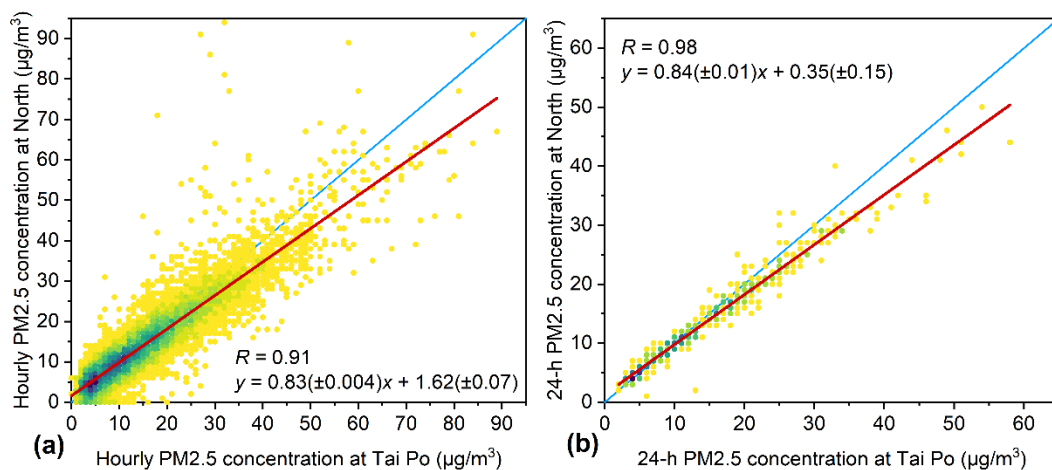

**Figure S3.** Correlation between PM<sub>2.5</sub> concentration recorded at the experimental site (North station) and Tai Po station between 10 July 2020 and 31 October 2021 with (a) hourly, and (b) 24-h frequency. PM<sub>2.5</sub> concentration data were taken from the Environmental Protection Department of Hong Kong (<https://cd.epic.epd.gov.hk/>).
